# Supplementary material for: Renal Denervation Attenuates Adverse Remodeling and Intramyocardial Inflammation in Acute Myocardial Infarction With Ischemia–Reperfusion Injury
Source: Frontiers journal article supplement (doi:10.3389/fcvm.2022.832014), 2022-04-28

## Supplemental Materials

**Supplemental Figure 1.** Representative immunofluorescence staining of CD163 monocyte-macrophage in porcine heart IZ, BZ and RZ between two groups.

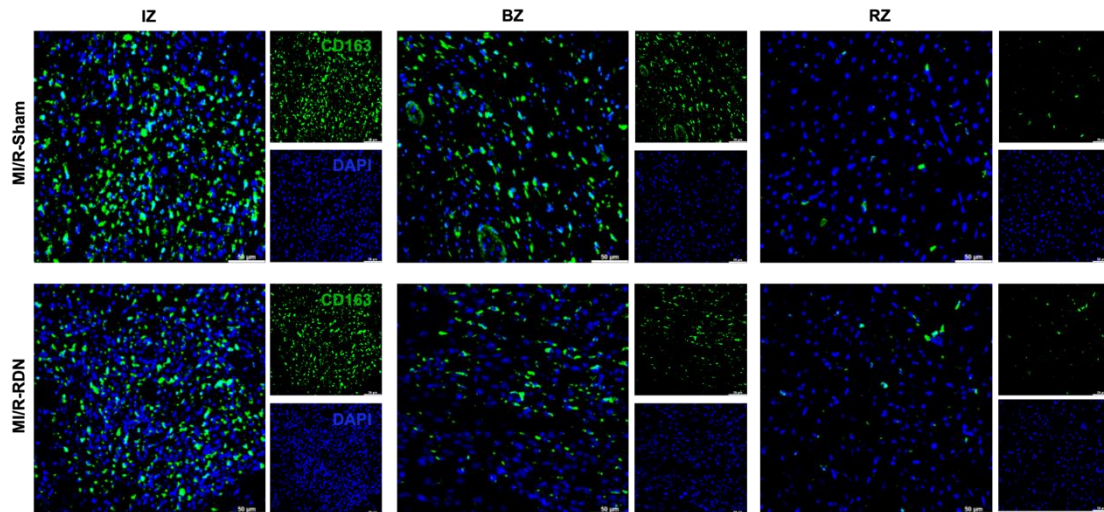

Supplement: Image_1.PDF [file Image_1.PDF]
