# Supplementary material for: Renal Denervation Attenuates Adverse Remodeling and Intramyocardial Inflammation in Acute Myocardial Infarction With Ischemia–Reperfusion Injury
Source: Frontiers journal article supplement (doi:10.3389/fcvm.2022.832014), 2022-04-28

## Supplemental Materials

### Uncropped gels

**Supplementary Figure 2.** Full unedited gel for Figure 6A.

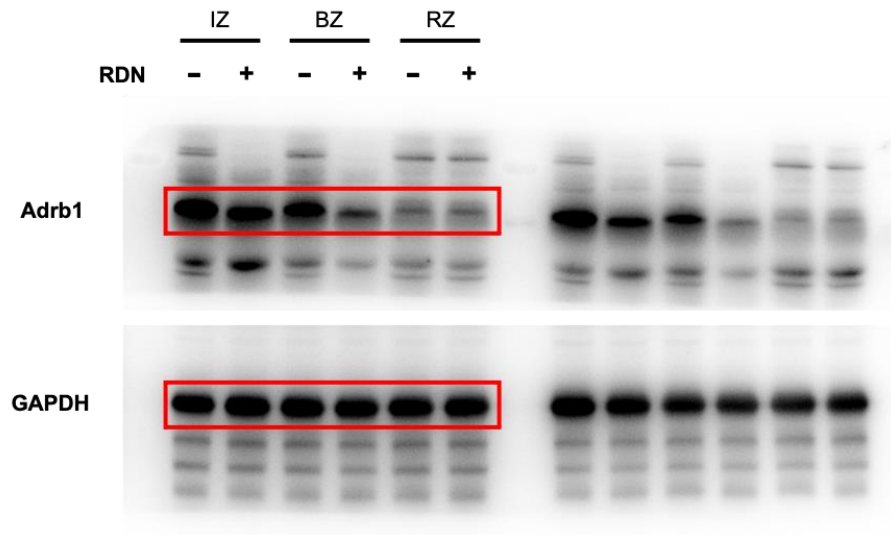

Supplement: Image_2.pdf [file Image_2.pdf]
