# Supplementary material for: Renal Denervation Attenuates Adverse Remodeling and Intramyocardial Inflammation in Acute Myocardial Infarction With Ischemia–Reperfusion Injury
Source: Front Cardiovasc Med. 2022 Apr 28;9:832014. doi: 10.3389/fcvm.2022.832014 (PMC9095912; doi:10.3389/fcvm.2022.832014)
Supplement: Supplementary file 1 [file Data_Sheet_1.xlsx]

## Sheet: Figure 3E
	Catecholamine (ng/g)
	NE						E						DA
Sample	Pre-MI/R	Post-MI/R	Day 1	Day 7	Day 30		Pre-MI/R	Post-MI/R	Day 1	Day 7	Day 30		Pre-MI/R	Post-MI/R	Day 1	Day 7	Day 30
Sham	287.144	302.957	776.12	878.032	551.529		98.09	50.9837	66.872	265.881	182.451		32.11	30.19	54.54	153.255	133.411
	501.613	629.24	1043.6	1261.73	505.425		8.1174	24.8941	44.6269	115.153	36.3084		51.146	24.6563	38.1559	86.5699	34.6343
	176.436	560.689	617.078	768.332	412.609		72.5481	39.8364	118.904	111.094	113.861		48.3333	75.6676	43.157	54.5642	50.6077
	97.8564	259.126	340.726	442.518	182.259		40.8751	35.0933	65.1073	86.822	49.0237		95.146	36.5809	34.7159	102.296	32.998
	100.287	177.328	230.734	357.56	227.043		38.079	69.4451	46.4666	80.934	83.4716		45.0326	57.6937	45.8425	40.7701	34.5172
	374.7	198.684	149.767	287.262	387.533		5.4532	44.3108	26.0376	69.9933	46.9876		23.4008	38.9256	11.5699	43.2389	16.7218
	249.264	497.856	628.57	378.609	214.454		9.39	16.4588	22.5258	60.9651	30.876		20.0596	32.7649	32.1179	30.5001	18.7489
RDN	214.646	453.128	760.572	560.386	130.009		9.5366	12.8225	44.1662	55.7276	51.4157		9.6364	10.5764	20.9681	13.2831	18.8627
	155.158	356.262	594.672	374.224	330.823		5.4997	37.1324	32.279	30.7342	17.2754		18.1373	30.6998	35.3546	28.5563	15.4245
	83.4579	181.651	283.687	150.834	79.3561		7.487	30.3823	41.0511	41.4112	7.92		14.3366	34.3359	58.6957	50.7702	24.1625
	138.973	198.019	215.355	230.823	225.224		32.8453	20.4716	62.5853	73.7008	72.0879		12.6491	23.3705	14.9312	29.2586	32.8269
	192.748	364.63	492.263	374.7	287.532		36.7342	49.6236	69.253	76.0475	62.7457		15.7491	21.5636	11.7426	26.7893	23.9653
	349.092	495.066	657.673	495.066	426.334		88.4515	38.168	40.7302	38.906	25.1508		89.4611	73.4445	47.3163	54.823	50.0122
	95.3753	198.509	417.919	463.807	286.403		37.8145	67.0065	74.204	87.6453	71.078		98.5517	22.6867	26.889	21.5925	32.7849
	180.044	312.115	391.108	170.374	84.9739		33.1951	41.5158	50.7569	102.515	55.7552		41.7335	56.0428	40.9569	48.9104	38.2913

## Sheet: Figure 3F
	Catecholamine (ng/g)
Sample	NE	E	DA
Sham	275.79	38.3622	3.6096
	251.085	17.3315	6.01238
	297.061	12.9732	4.70634
	359.367	12.8138	6.84044
	155.595	36.169	4.90762
	281.482	44.7533	1.99883
	90.7703	43.7378	2.29096
RDN	25.7333	7.2499	4.51816
	19.1193	2.2161	1.98879
	26.8195	12.5615	3.04982
	34.1894	1.9938	0.985013
	52.3237	4.7291	4.01283
	87.1355	18.077	1.59546
	18.9782	30.938	2.15854
	66.6553	2.6012	2.03938

## Sheet: Figure 3G
	Catecholamine (ng/g)
	NE				E				DA
Sample	IZ	BZ	RZ		IZ	BZ	RZ		IZ	BZ	RZ
Sham	590.736	309.064	756.077		17.3707	5.9106	8.9524		16.9359	7.9625	25.6161
	562.107	580.731	840.599		12.4697	12.2247	8.4559		16.517	19.5484	28.2866
	405.59	696.133	959.358		14.8258	21.11	30.2707		5.9993	15.2596	20.4336
	376.889	953.466	692.637		12.8957	30.9342	20.6561		6.393	21.0741	11.2453
	409.316	350.428	950.538		3.0419	3.2761	11.1882		9.3847	13.6856	32.2027
	252.964	392.382	777.181		8.7523	13.1237	25.5011		11.5688	17.9394	33.6539
	261.783	783.9	813.198		2.9164	11.6559	16.5202		7.8372	20.52	17.2667
RDN	156.957	300.911	410.285		4.7357	15.8678	16.7735		0.9273	6.7281	4.4264
	155.926	184.04	412.007		4.9865	6.3586	19.3882		0.9607	3.9468	5.7391
	207.896	322.634	764.796		7.2345	9.8404	28.5962		8.9343	12.3313	37.2396
	263.712	679.712	761.994		3.3091	11.1933	15.1078		4.099	17.0268	20.2043
	251.104	958.789	639.935		1.8689	11.7454	8.1906		2.7882	22.1955	21.3936
	273.89	695.613	643.815		1.7791	1.2595	7.6412		2.0922	17.9791	20.6805
	342.863	536.496	878.34		2.5101	2.3426	17.7898		4.9196	12.2538	17.9517
	171.679	484.549	749.774		1.6466	2.2776	33.2675		1.7348	10.7135	9.8897

## Sheet: Figure 4A
	LVEF				LVESD				LVEDD				IVS				LV Mass				E/A
Sample	1 DAY	7 DAY	30 DAY		1 DAY	7 DAY	30 DAY		1 DAY	7 DAY	30 DAY		1 DAY	7 DAY	30 DAY		1 DAY	7 DAY	30 DAY		1 DAY	7 DAY	30 DAY
Sham	51	50.1	54.7		27.9	27.1	27.8		37	36.8	37.7		4.6	4.6	5.7		38.0563	38.2416	51.6242		0.6397	0.7761	0.4762
	46.4	44.6	43.2		26.5	26.8	27.4		35.7	35.8	37		5.3	5.3	5.4		48.7548	48.3034	50.9372		1.0826	0.8365	0.6106
	50.5	46.3	45.4		26.1	27.4	29		34.3	35.2	37		5.8	5.6	5.2		46.4352	46.8913	47.0617		1.0816	0.9424	0.9008
	51.4	48.7	47.8		25.8	28.4	29.9		34.2	37.2	39.3		6.4	6.4	6.3		52.6013	60.5266	65.7401		0.5844	0.6444	0.6744
	50.3	48.7	48.5		26.5	27.5	28.6		35.3	36.7	37.6		6.1	6.2	6.1		51.491	56.1638	57.897		0.7937	0.8219	0.871
	50.2	54.1	54.9		28.2	28.6	26.9		37.3	39.1	37.5		6.5	6.1	7		62.0485	63.8489	66.4427		0.9091	0.7879	0.7647
	51.7	47.4	46.5		27.9	29.3	30.2		37.4	38.2	39.3		6.7	6.7	6.1		61.7003	64.5875	63.7425		1.3333	0.9125	1.4091
RDN	46.6	45.2	44.3		27.6	27.9	29.1		35.3	35.7	37.2		4.5	4.5	5.1		36.8265	37.5542	48.0677		1.6548	0.9054	0.6463
	49.5	49	47.1		29.6	29.3	29.9		38.1	38.2	39.3		5.4	5.5	5.7		52.4691	53.3093	59.8166		0.9412	1.1137	1.4487
	51	55.2	53.1		28.2	27.3	28.9		37.7	38.3	39.8		6.3	6.4	6.6		61.9025	62.2861	68.5397		1.0693	0.9344	0.8846
	47.5	41.5	45.7		27	29.6	29.5		35	37.8	38.2		6.1	6	6.1		51.3087	57.8028	59.4748		0.7639	0.8571	0.6667
	51.8	54.5	55.1		23	24	25.4		30.5	34.3	34.9		6.5	6.5	6.6		44.0711	53.4065	56.1001		1.25	1.1392	0.9231
	48.6	44.5	44.9		28.6	32.2	32.4		37	41.2	42.2		6.4	5.8	5.9		60.5959	65.5803	69.8132		0.7463	0.8657	0.8889
	52.1	49.8	47.9		28	29.1	30		37.7	39	39.4		6.5	6.2	6.1		63.8084	64.2295	64.0193		1.1837	1.0702	0.6267

## Sheet: Figure 4B
	cTnT
Sample	Pre-MI	Post-MI	D1	D5	D30
Sham	0.003	0.003	0.6864	0.085	0.005
	0.006	0.037	0.8736	0.054	0.006
	0.011	0.039	1.0296	0.101	0.007
	0.004	0.017	1.248	0.167	0.007
	0.009	0.024	0.3252	0.044	0.004
	0.005	0.015	1.6352	0.1106	0.006
	0.008	0.032	0.546	0.0992	0.007
RDN	0.003	0.014	0.6612	0.038	0.004
	0.005	0.048	0.3468	0.018	0.007
	0.005	0.013	0.9564	0.023	0.004
	0.005	0.025	1.0836	0.054	0.005
	0.006	0.04	0.4512	0.037	0.007
	0.003	0.018	1.0116	0.031	0.006
	0.003	0.019	0.7152	0.076	0.005

## Sheet: Figure 4C
	CMR
Sample	Day 5	Day 30
Sham	16	12
	19	17
	15	11
	10	13
	14	15
	11	9
	13	12
RDN	16	9
	15	11
	13	7
	13	12
	12	6
	9	11
	8	8

## Sheet: Figure 5D
MDA			SOD
Sham	RDN		Sham	RDN
0.481705	0.120864		1.06788	2.01615
0.41598	0.187521		1.24795	1.29049
0.22095	0.179657		1.22222	1.78608
0.58304	0.119689		0.716555	1.07705
0.395663	0.546233		1.06876	1.05236
1.3148	0.488559		0.769206	1.32809
1.30033	0.383988		0.907425	1.11698
	0.350473			1.07252

## Sheet: Figure 5E
	Col1A1				Col3A1
Sample	IZ	BZ	RZ		IZ	BZ	RZ
Sham	1.2414	1.0513	0.1576		0.9736	0.6001	0.2403
	1.0652	0.4844	0.0703		0.9521	0.5478	0.1405
	0.9835	0.82	0.149		0.98	0.5977	0.1274
	0.9149	0.7383	0.091		1.1067	0.6035	0.135
	0.9038	0.6417	0.0861		1.0052	0.5921	0.1381
	0.9558	0.5683	0.0794		0.9844	0.5683	0.1424
	0.9729	0.5263	0.0721		1.0053	0.582	0.1377
RDN	0.5538	0.1308	0.1171		1.0109	0.3016	0.1333
	0.6044	0.1466	0.1224		0.5561	0.259	0.196
	0.4832	0.1511	0.0812		0.5334	0.1784	0.1425
	0.597	0.2204	0.1261		0.7448	0.2913	0.1976
	0.639	0.1395	0.1212		0.6213	0.2507	0.2159
	0.4892	0.1407	0.0253		0.5483	0.1542	0.073
	0.6706	0.1905	0.1188		0.6836	0.2295	0.1084
	0.5271	0.1308	0.0953		0.542	0.2053	0.1567

## Sheet: Figure 6B
TNF-a
Sham		RDN
D5	D30	D5	D30
186.833	137.833	165.042	106
182.583	137.625	185.958	128.625
186.667	140.708	204.458	133.708
202.75	154.375	141.833	112.25
189.375	139.958	172.083	114.5
		183.833	121.833

## Sheet: Figure 6C
	IL-1b				IL-6				TNF-a				INF-g				TGF-b				IL-10
Sample	IZ	BZ	RZ		IZ	BZ	RZ		IZ	BZ	RZ		IZ	BZ	RZ		IZ	BZ	RZ		IZ	BZ	RZ
Sham	1.74252	0.214258	0.23573		1.61079	0.398574	0.15136		3.30051	0.797704	0.526103		1.72444	3.63743	0.651699		1.24759	1.53592	0.859074		1.1972	1.53246	1.10299
	1.58032	1.52148	0.525055		1.23024	1.98586	0.751772		1.06103	1.11426	1.58492		0.592859	0.711863	2.10241		1.32856	1.04162	0.771929		1.69389	1.45085	0.452539
	1.36065	0.88766	0.0681084		0.685777	0.654921	0.0982922		0.970598	1.54667	0.395127		0.886399	0.521264	1.70639		1.07333	1.13002	0.791633		1.68739	0.119826	0.926209
	0.971056	0.576459	0.305265		1.29662	1.31712	0.209194		1.12739	1.71483	0.843698		1.325	1.25167	1.11706		0.951528	1.10146	0.789869		1.11682	1.11077	0.568834
	0.720486	1.07276	0.23586		0.868423	1.11199	1.0297		0.704149	0.975476	3.16768		1.15295	3.11577	1.17822		0.906761	1.08479	0.582287		0.356441	1.08141	0.607188
	0.792003	1.24943	0.220224		0.864813	1.67519	0.993125		0.633303	1.72798	1.76649		1.31678	0.679893	1.97421		0.773241	1.0681	0.623875		0.623079	0.791154	1.23344
	0.396729	0.798611	0.0688724		0.755652	0.920919	0.289989		0.585196	1.59067	0.614149		0.548572	1.97871	1.62666		0.842525	0.685329	0.648263		1.1782		0.785159
RDN	0.607525	0.240639	0.136762		1.35716	0.348331	0.145983		2.13462	0.819865	0.698459		0.41833	0.742973	2.54479		1.03535	0.723114	0.631924		0.610838	0.184451	1.12508
	0.675573	0.350107	0.295294		1.07379	0.251575	0.202336		2.63446	0.304529	0.776554		0.578323	1.21838	1.83493		0.901799	0.637387	0.691848		2.46014	1.5793	1.31657
	0.790615	0.266471	0.298293		0.261901	0.153802	0.229603		0.627575	0.228352	1.03939		1.02393	1.09821	1.32716		0.866838	0.715204	1.25568		1.50243	3.15927	0.439914
	0.685788	0.339288	0.0491006		0.406315	0.329461	0.167112		1.03491	0.896625	0.631111		0.813748	2.03788	1.18313		0.871382	0.728111	0.752443		0.594596	1.87818	1.41858
	0.394124	0.393232	0.31625		0.778098	0.360547	0.131315		1.35296	0.888248	0.860751		0.808029	0.499667	1.23227		0.86409	0.721101	0.920692		2.66166	1.41549	1.13575
	0.294093	0.210449	0.212525		0.447224	0.377834	0.160348		0.947197	0.948231	0.768483		1.12567	1.56149	0.524192		0.84562	0.725794	0.725973		1.55252	1.26694	1.36252
	0.448591	0.418108	0.216989		0.402727	0.417779	0.115931		0.491454	0.656106	0.736414		0.823908	0.994929	1.11129		0.870472	0.674136	0.96673		0.917078	1.2926	1.49187

[truncated: 1 more sheets: Sup Table 1]
